# Supplementary material for: Marfan Syndrome Variability: Investigation of the Roles of Sarcolipin and Calcium as Potential Transregulator of FBN1 Expression
Source: MDPI journal article supplement (doi:10.3390/genes9090421), 2018-08-21
Supplement: s1 [file s1]

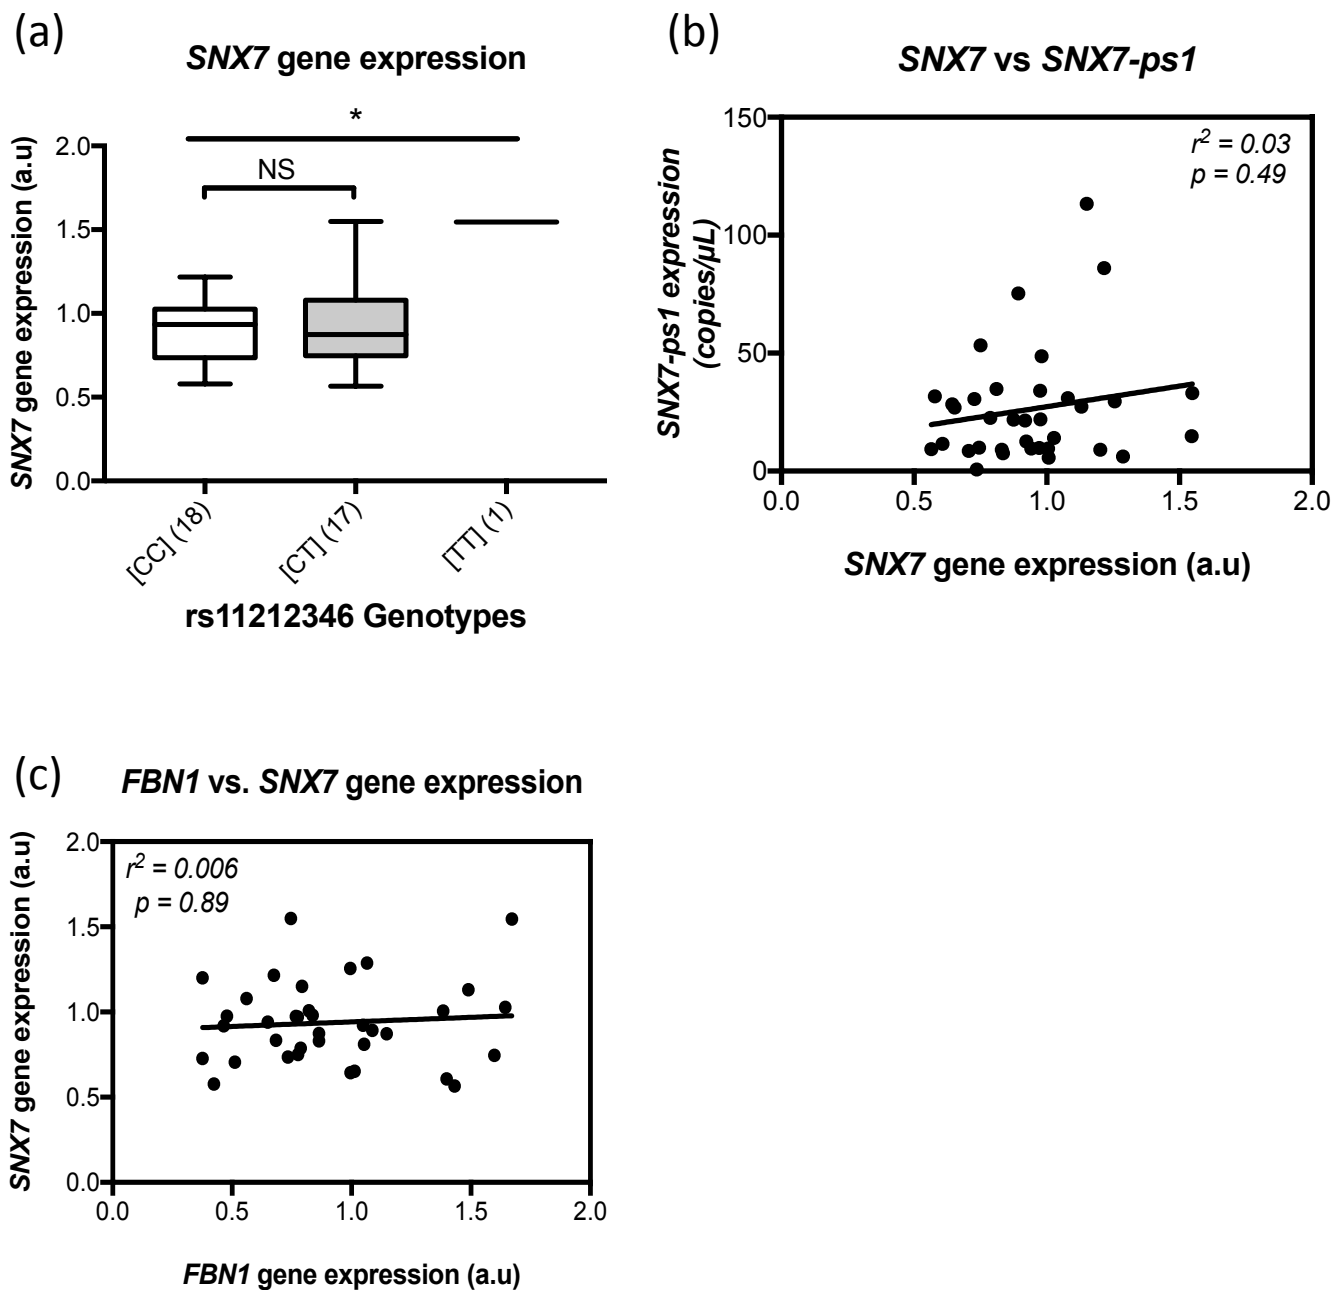

**Figure S2. Exploration of the antisense hypothesis for *SNX7-ps1*** (a) Boxplot of *SNX7* expression according to rs11212346 genotypes (p-value = 0.033) (b) Correlation plot between *SNX7* and *SNX7-ps1* (c) Correlation plot between *SNX7* and *FBN1* gene expression. No correlation of expression was observed. [NS] – Not Significant; [\*] – p-value < 0.05.
