# Supplementary material for: Marfan Syndrome Variability: Investigation of the Roles of Sarcolipin and Calcium as Potential Transregulator of FBN1 Expression
Source: MDPI journal article supplement (doi:10.3390/genes9090421), 2018-08-21
Supplement: s1 [file s1]

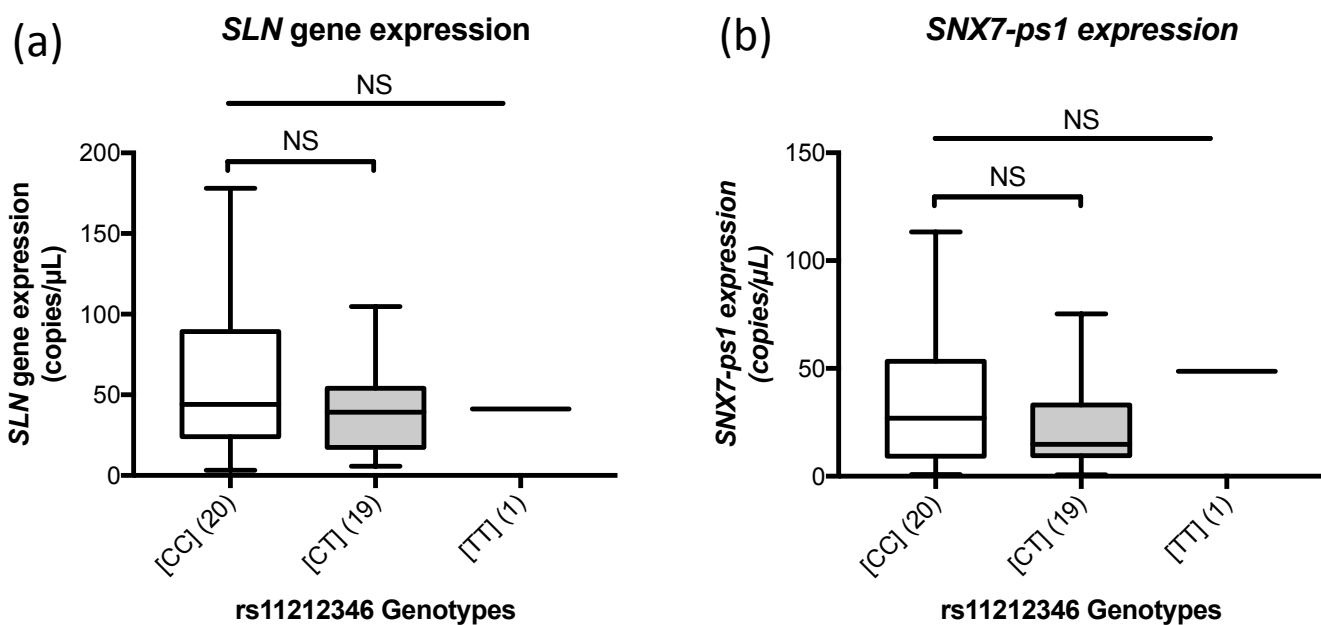

**Figure S1. Boxplot of *SLN* and *SNX7-ps1* expression according to rs11212346 genotypes.** (a) *SLN* gene. No difference of expression is observed between the three groups ( $p = 0.30$ ) and between [CC] and [CT] group ( $p = 0.16$ ) (b) *SNX7-ps1* gene. No difference of expression is observed between the three groups ( $p = 0.29$ ) and between [CC] and [CT] group ( $p = 0.50$ ). [NS] : Not Significant
