# Supplementary material for: Marfan Syndrome Variability: Investigation of the Roles of Sarcolipin and Calcium as Potential Transregulator of FBN1 Expression
Source: MDPI journal article supplement (doi:10.3390/genes9090421), 2018-08-21
Supplement: s1 [file s1]

(a)

**FOS gene expression with 1 $\mu$ M A23187**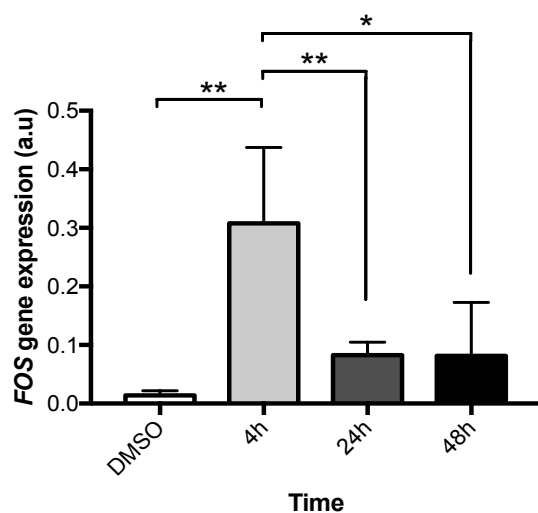**FOS gene expression with 10 $\mu$ M A23187**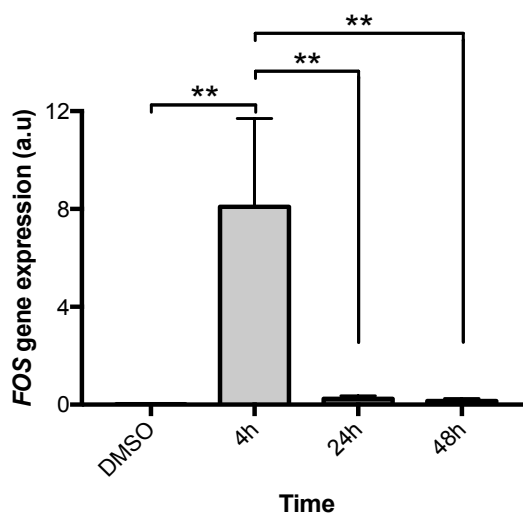

(b)

**FBN1 gene expression with 1 $\mu$ M A23187**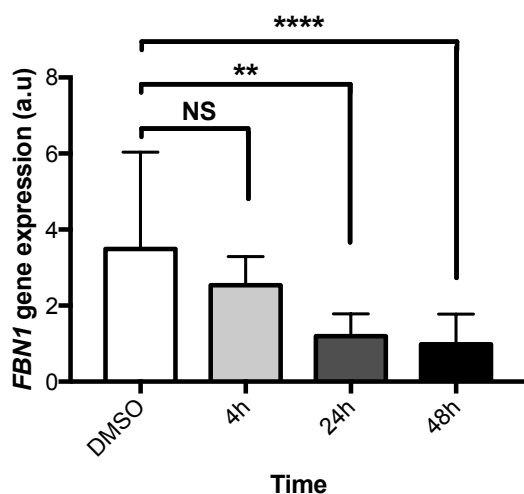**FBN1 gene expression with 10 $\mu$ M A23187**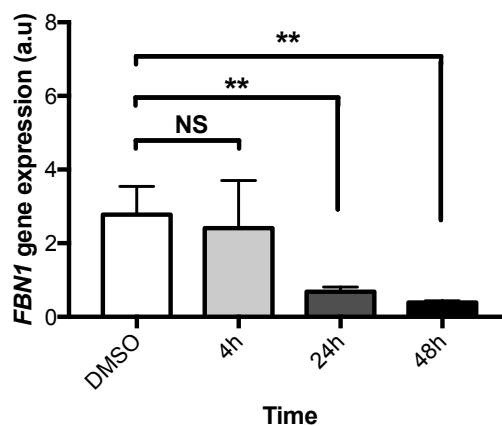

**Figure S4. Effect of A23187 on gene expression in control.** Control skin fibroblasts were incubated with DMSO (untreated), 1 $\mu$ M or 10 $\mu$ M of A23187 for 4h, 24h, and 48h. (a) FOS gene expression (b) FBN1 gene expression after treatment with A23187

[NS]  $p$ -value > 0.05; \*\* $p$ -value < 0.01; \*\*\* $p$ -value < 0.001; \*\*\*\* $p$ -value < 0.0001
