# Supplementary material for: Marfan Syndrome Variability: Investigation of the Roles of Sarcolipin and Calcium as Potential Transregulator of FBN1 Expression
Source: MDPI journal article supplement (doi:10.3390/genes9090421), 2018-08-21
Supplement: s1 [file s1]

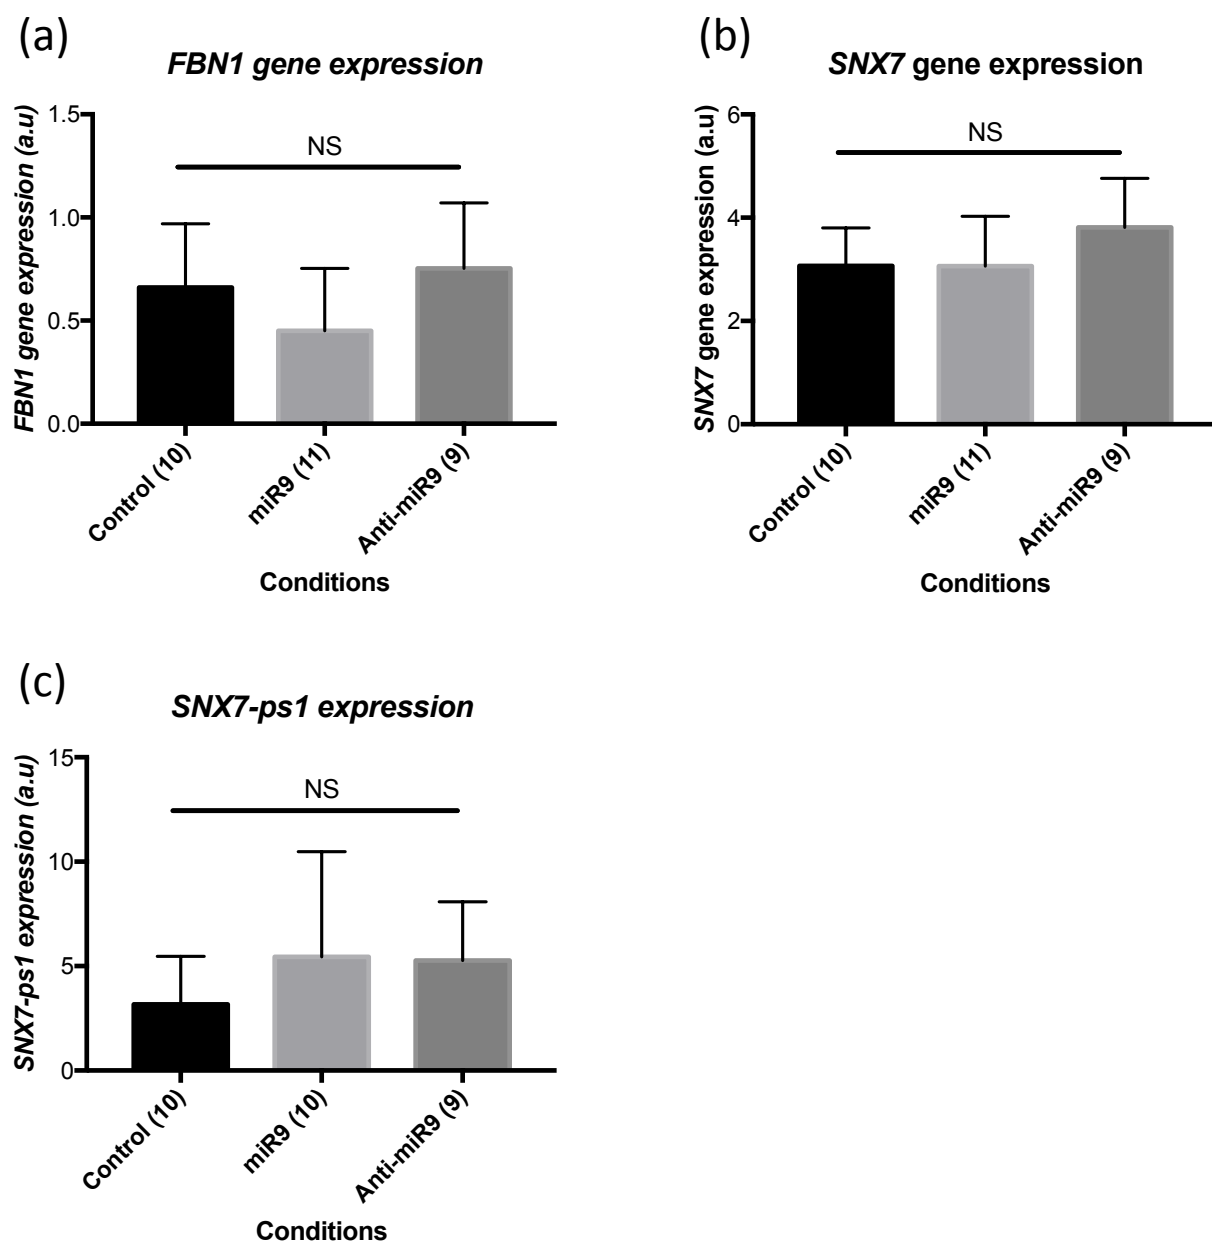

**Figure S3. Effect of miR9 on gene expression.** (a) *FBN1* gene expression. No significant difference between the three conditions (p-value = 0.07) (b) *SNX7* gene expression. No significant difference between the three conditions (p-value = 0.11) (c) *SNX7-ps1* gene expression. No significant difference between the three conditions (p-value = 0.24).

[miR9] – synthetic miR9; [Anti-miR9] – siRNA targeting miR9; [NS] Not significant
