# Supplementary material for: Marfan Syndrome Variability: Investigation of the Roles of Sarcolipin and Calcium as Potential Transregulator of FBN1 Expression
Source: MDPI journal article supplement (doi:10.3390/genes9090421), 2018-08-21
Supplement: s1 [file s1]

| <b>Name</b>     | <b>Foward</b>           | <b>Reverse</b>           |
|-----------------|-------------------------|--------------------------|
| <i>FBN1</i>     | AGTCGGGGCCAAGAGAAGAGGCG | TCCATCCAGGGCAACAGTAAGCAT |
| <i>FOS</i>      | AACCGCCACGATGATGTTCT    | TCTGCGGGTGAGTGGTAGTA     |
| <i>GAPDH</i>    | GTCGCCAGCCGAGCCACATC    | CCAGGCGCCCAATACGACCA     |
| <i>SNX7-ps1</i> | CCTTACTACATGGGAACCATTC  | GGACATGGCAGATCCAGAAA     |
| <i>SLN</i>      | GCTCAAGTTGGAGACAGCGA    | CGTGTGGGTTGAAGGGATGT     |
| <i>SNX7</i>     | CCCTGAAAGCAGATTGGGAG    | GTGAAGGTTGGTCTGTGATGTAAG |
| <i>SDHA</i>     | AAGGGCTCCGACTGGCTGGGG   | TTTCTAGCTCGACCACGGCGGC   |

Table S1: Primers sequences for gene expression quantification.
