# Supplementary material for: Marfan Syndrome Variability: Investigation of the Roles of Sarcolipin and Calcium as Potential Transregulator of FBN1 Expression
Source: Genes (Basel). 2018 Aug 21;9(9):421. doi: 10.3390/genes9090421 (PMC6162465; doi:10.3390/genes9090421)
Supplement: Supplementary file 1 [file genes-09-00421-s001.zip]

Archive with 5 entries (5 files):
- Figure S4.pdf
- Table S1.pdf
- Figure S1.pdf
- Figure S2.pdf
- Figure S3.pdf
